# Supplementary material for: A Systems Biology Approach Investigating the Effect of Probiotics on the Vaginal Microbiome and Host Responses in a Double Blind, Placebo-Controlled Clinical Trial of Post-Menopausal Women
Source: PubMed Central journal article supplement (PMC4134203; doi:10.1371/journal.pone.0104511), 2014-08-15

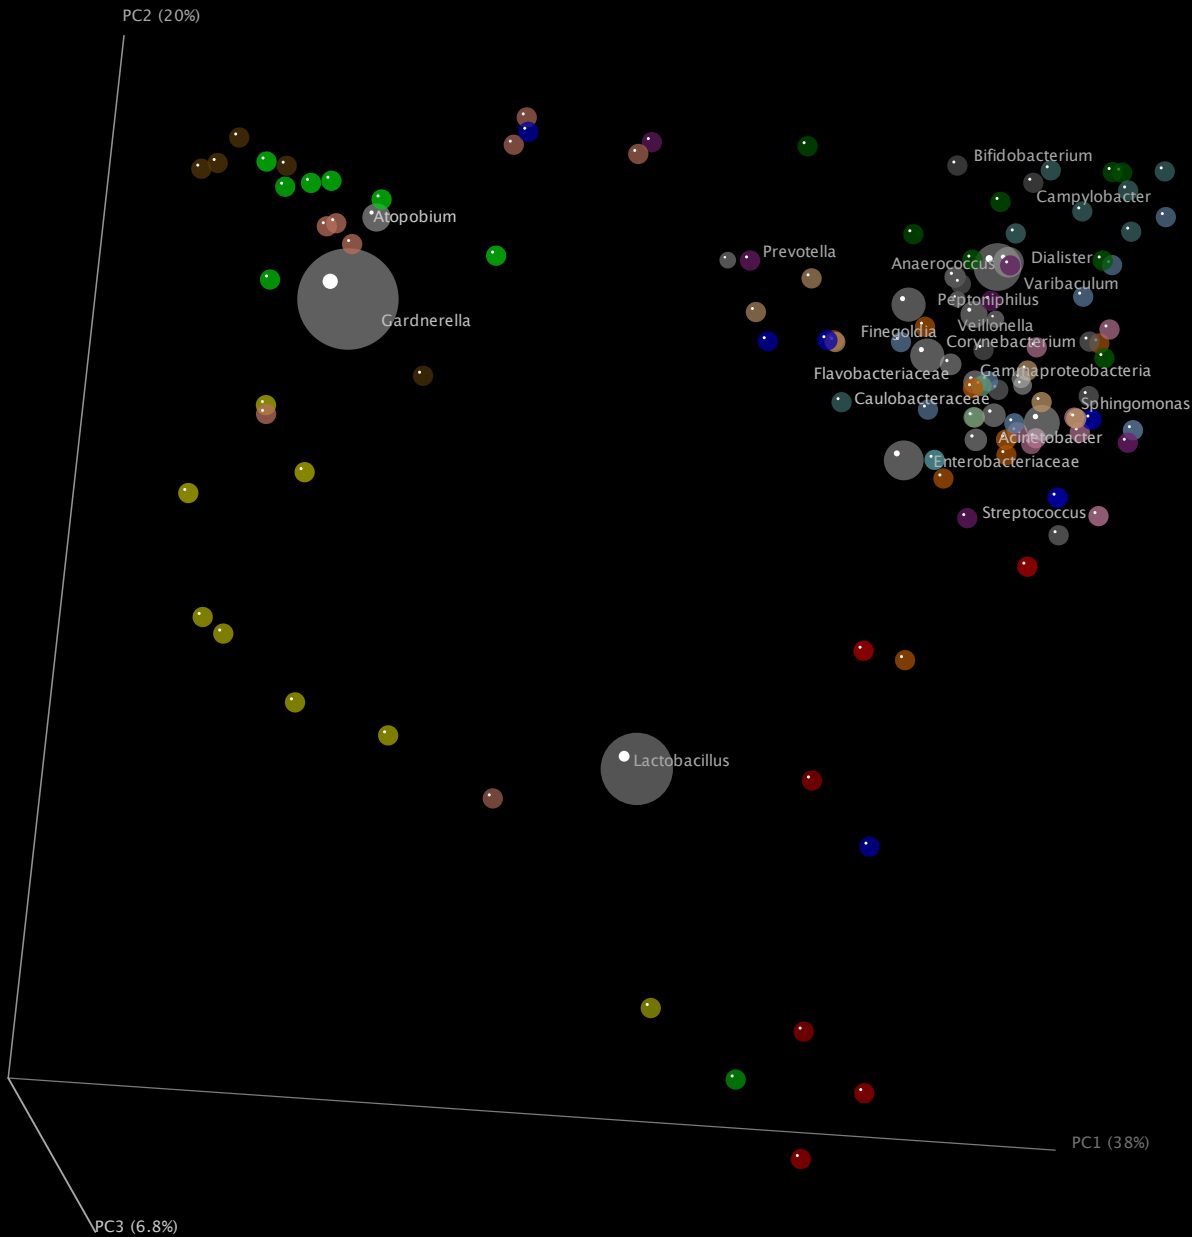

Supplement: pone.0104511.s003.pdf [file pone.0104511.s003.pdf]
