# Supplementary material for: A Systems Biology Approach Investigating the Effect of Probiotics on the Vaginal Microbiome and Host Responses in a Double Blind, Placebo-Controlled Clinical Trial of Post-Menopausal Women
Source: PubMed Central journal article supplement (PMC4134203; doi:10.1371/journal.pone.0104511), 2014-08-15
Supplement: pone.0104511.s006.pdf [file pone.0104511.s006.pdf]

A.

PCA-X

■ pro b  
 ■ pro a

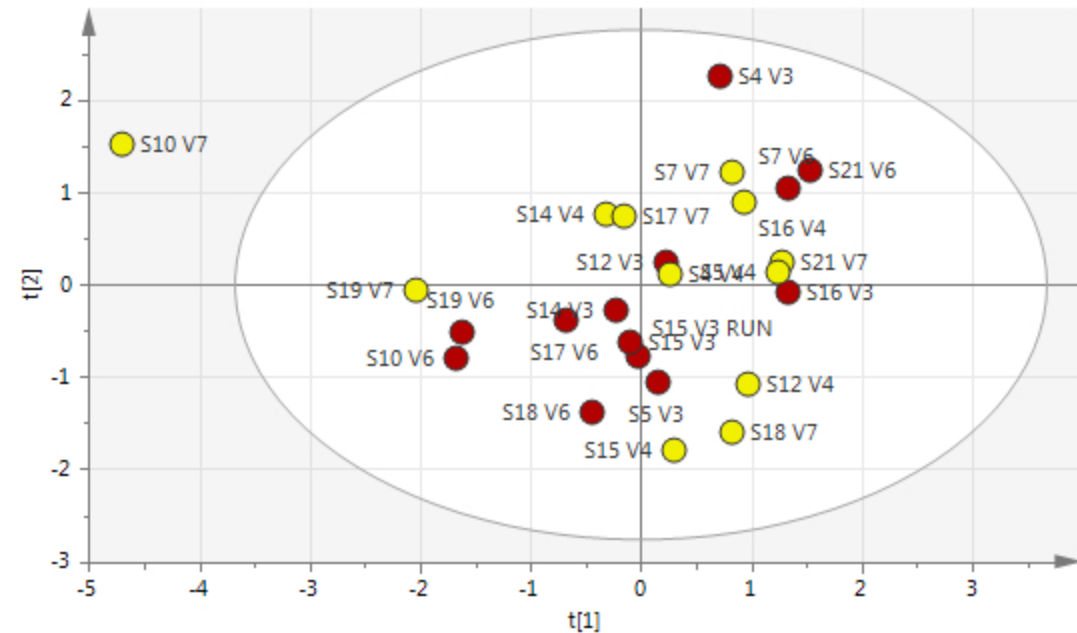

R2X[1] = 0.378

R2X[2] = 0.213

Ellipse: Hotelling's  $T^2$  (95%)  $F(2, 18) = 0.316$ 

SIMCA 13.0 - 9/23/2013 5:29:35 PM (UTC-4)

B.

(PCA-X)

■ plac b  
 ■ plac a

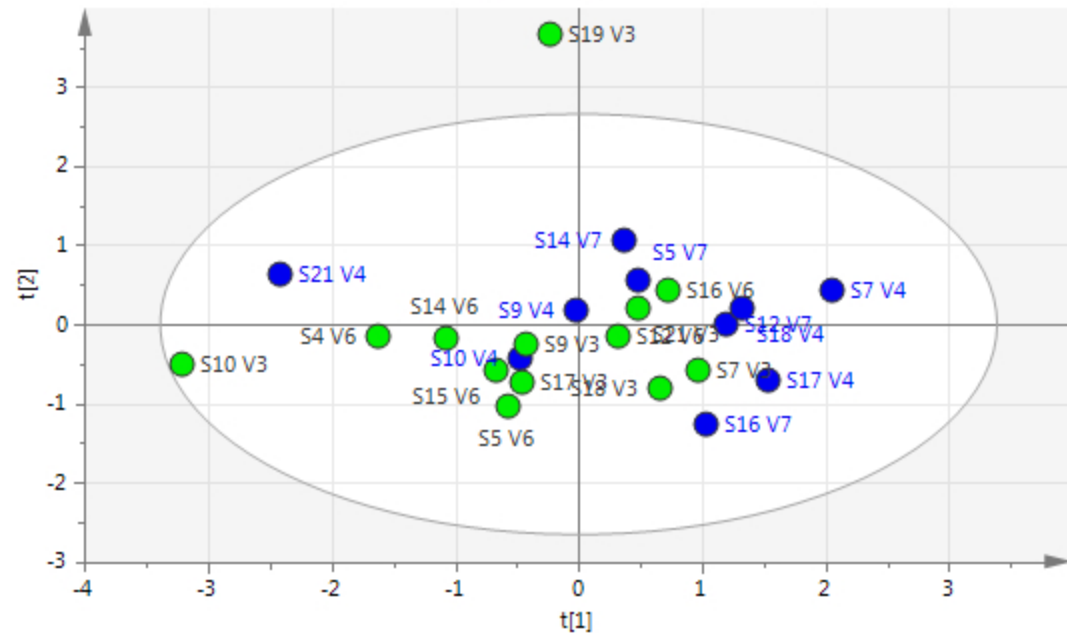

R2X[2] = 0.195

Ellipse: Hotelling's  $T^2$  (95%)

SIMCA 13.0 - 9/23/2013 5:36:08 PM (UTC-4)
